# Supplementary material
Source: PubMed Central journal article supplement (PMC2831085)

# Feminizing cholinergic neurons in a male *Drosophila* nervous system enhances aggression

Sibu Mundiyanapurath,<sup>1,†</sup> Yick-Bun Chan,<sup>2,†,\*</sup> Adelaine K.W. Leung<sup>2</sup> and Edward A. Kravitz<sup>2</sup>

<sup>1</sup>Medical Faculty Heidelberg; University of Heidelberg; Heidelberg, Germany; <sup>2</sup>Department of Neurobiology; Harvard Medical School; Boston, MA USA

<sup>†</sup>These authors contributed equally to this work.

**Key words:** *Drosophila*, aggression, cholinergic neurons, transformer, feminization

Previous studies in *Drosophila* have demonstrated that whether flies fight like males or females can be switched by selectively manipulating genes of the sex determination hierarchy in male and female nervous systems. Here we extend these studies by demonstrating that changing the sex of cholinergic neurons in male fruit fly nervous systems via expression of the *transformer* gene increases the levels of aggression shown by the flies without altering the way the flies fight. Transformer manipulation in this way does not change phototaxis, geotaxis, locomotion or odor avoidance of the mutant males compared to controls. Cholinergic neurons must be feminized via this route during the late larval/early pupal stages of development to show the enhanced aggression phenotype. Other investigators have shown that this is the same time period during which sexually dimorphic patterns of behavior are specified in flies. Neurons that co-express *fruitless* and choline acetyl transferase are found in varying numbers within different clusters of *fruitless*-expressing neurons: together they make up approximately 10% of the pool of *fruitless*-expressing neurons in the brain and nerve cord.

## Supplementary Material

\*Correspondence to: Yick-Bun Chan; Email: yick-bun\_chan@hms.harvard.edu  
Submitted: 03/11/09; Revised: 05/04/09; Accepted: 05/07/09  
Previously published online: <http://www.landesbioscience.com/journals/fly/article/8989>

Supplementary information

Table S1. Counts of the numbers of Fru<sup>M</sup> positive and *cha-Gal4*-driver-labeled neurons in various *Fruitless*-neuron clusters in the fly nervous brain and nerve cord.

|                                     | Fru <sup>M</sup> |     |    | Cholinergic |     |    | %         |
|-------------------------------------|------------------|-----|----|-------------|-----|----|-----------|
|                                     | #                | SEM | n  | #           | SEM | n  | Chol      |
| <b>Neuronal Clusters</b>            |                  |     |    |             |     |    |           |
| <b>Anterior Brain</b>               |                  |     |    |             |     |    |           |
| 1 <i>fru</i> -aSP1                  | 18               | 2   | 14 | 0           | 0   | 14 | <b>0</b>  |
| 2 <i>fru</i> -aSP2                  | 67               | 14  | 14 | 3           | 1   | 14 | <b>4</b>  |
| 3 <i>fru</i> -aSP3                  | 45               | 7   | 14 | 3           | 2   | 14 | <b>6</b>  |
| 4 <i>fru</i> -Lv                    | 22               | 3   | 14 | 1           | 1   | 14 | <b>3</b>  |
| 5 <i>fru</i> -mAL                   | 35               | 3   | 14 | 2           | 1   | 14 | <b>7</b>  |
| 6 <i>fru</i> -AL                    | 71               | 8   | 14 | 8           | 3   | 14 | <b>11</b> |
| 7 <i>fru</i> -mcAL                  | 52               | 7   | 14 | 3           | 1   | 14 | <b>5</b>  |
| <b>Anterior and Posterior Brain</b> |                  |     |    |             |     |    |           |
| 8 <i>fru</i> -SG                    | 33               | 7   | 7  | 15          | 4   | 7  | <b>44</b> |
| 9 <i>fru</i> -M                     |                  |     |    |             |     |    |           |
| 10 <i>fru</i> -Ld                   |                  |     |    |             |     |    |           |
| <b>Posterior Brain</b>              |                  |     |    |             |     |    |           |
| 11 <i>fru</i> -Lo                   |                  |     |    |             |     |    |           |
| 12 <i>fru</i> -pSP1                 | 20               | 3   | 14 | 4           | 2   | 14 | <b>18</b> |
| 13 <i>fru</i> -pSP2                 | 26               | 9   | 14 | 2           | 1   | 14 | <b>8</b>  |
| 14 <i>fru</i> -P                    | 76               | 12  | 14 | 14          | 3   | 14 | <b>18</b> |
| 15 <i>fru</i> -pL                   | 12               | 5   | 14 | 1           | 1   | 14 | <b>4</b>  |

|                                 |                           |            |    |    |           |    |    |           |
|---------------------------------|---------------------------|------------|----|----|-----------|----|----|-----------|
| <b>Total Brain</b>              |                           | <b>923</b> | 40 | 7  | <b>94</b> | 9  | 7  | <b>10</b> |
| <b>Ventral Ganglia</b>          |                           |            |    |    |           |    |    |           |
| 16                              | <i>fru-Pr</i>             | 67         | 19 | 13 | 3         | 2  | 13 | <b>4</b>  |
| 17                              | <i>fru-PrMs</i>           | 248        | 30 | 13 | 12        | 8  | 13 | <b>5</b>  |
| 18                              | <i>fru-MsMt</i>           | 139        | 21 | 13 | 8         | 2  | 13 | <b>6</b>  |
| 19+20                           | <i>fru-MtAb &amp; -Ab</i> | 313        | 43 | 13 | 51        | 13 | 13 | <b>16</b> |
| <b>Total Ventral Nerve Cord</b> |                           | <b>766</b> | 91 | 13 | <b>74</b> | 17 | 13 | <b>10</b> |

Figure S1. Top view of multiwell plate used in behavioral screen (see Methods).

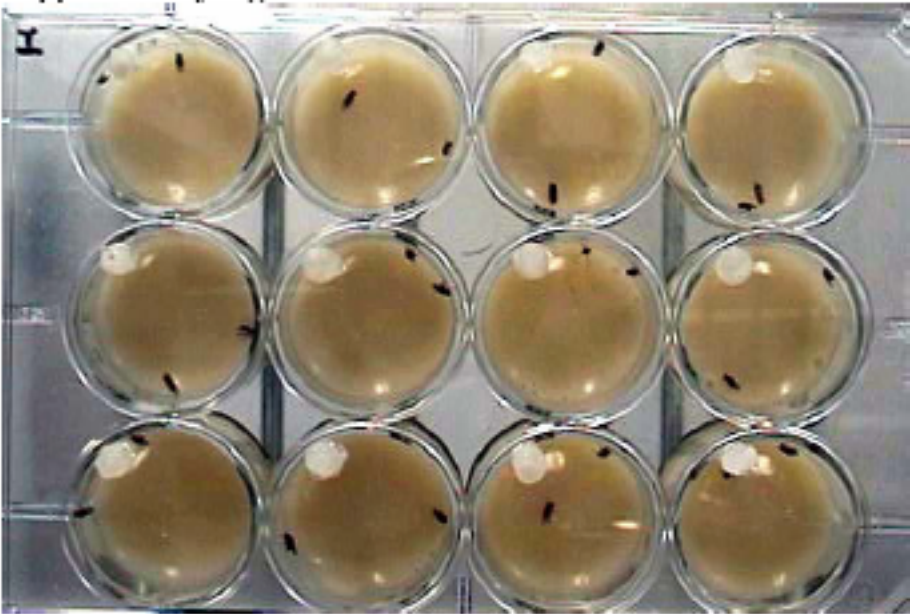

Supplement: NIHMS173683-supplement-suppl.pdf [file NIHMS173683-supplement-suppl.pdf]
